# Supplementary material for: Addressing the quality of paediatric primary care: health worker and caregiver perspectives from a process evaluation of PACK child, a health systems intervention in South Africa
Source: Springer Nature journal article supplement (doi:10.1186/s12887-021-02512-7), 2021-01-28
Supplement: MOESM2 [file 18808570]

## Staff Interview Guide: PACK Child Process Evaluation

### Introduction:

- Thank staff member for agreeing to meet/their time etc.
  - Outline the study aims and aims of the interview. Reiterate confidentiality
  - Check staff have read/understood the study information sheet.
  - Give them a chance to ask questions.
  - Check that they wish to proceed with the interview.
  - Complete/sign two consent forms (leave one with staff).
  - Advise staff that we seek their experience/views and importance of getting insight to improve delivery of the intervention beyond the study.
  - Advise them they can stop the interview at any point/decline to answer any questions.
  - Advise them when audio-taping will begin.
- 

### Interview questions:

#### I. Background/Experience

Can you start by telling me a bit about your professional background and how you came to be involved with the PACK Child study?

##### *Prompts*

- Do you work with children as part of your normal job role? If so in what capacity?
- Have you received any specific training in child health?

#### II. Study Role

How would you describe your role in this study?

##### *Prompts*

- How has the study affected the other tasks in your role at the clinic? What problems did you face? How did you manage any difficulties?
- How has this Study fitted in with your usual working pattern? Additional hours? Payment for overtime?

#### III. Thinking about the set-up phase of the study

How well do you feel the training prepared you for the study?

##### *Prompts*

- Who did your training- KTU trainer, master trainer, facility trainer?
- Were you able to attend all the training sessions?
- What feedback would you give on the guideline training?

Can you tell me about your experience of communicating with the study team? How was that?

#### IV. Guideline Use

Can you describe your experience of using the PACK Child guideline.

##### *Prompts*

- How have you found it useful in your consultations?
- What facilitates your ability to use the PACK Child guideline during a consultation?
- What are the barriers to using the PACK Child guideline?

#### V. Organisational

Have there been there any organisational problems that have influenced your use of PACK Child?

##### *Prompts*

- Have there been any resource issues? E.g. lack of guidelines, understaffed?

#### VI. Sustainability

Do you think that the PACK Child Guideline will continue to be used once the study is over?

##### *Prompts*

- How feasible do you think it would be for staff to use the PACK Child guideline in their consultations daily?
- What would prevent staff from using the guideline?
- What could encourage staff to use the guideline?

**When you started the study, what did you expect might happen? To what extent were your expectations met?**

Is there anything else you'd like to say about your experience of participating in the study?

- prompt – experience; suggestions; study requirements;  
overall 'feel' of the process etc

#### **Prompts/ follow-up questions:**

- Are you able to tell me more about that?
- Can you give an example of a time when that happened/ when you felt like that?
- How did that make you feel?
- What did you think about that?
- Just talk about whatever comes to mind
- What happened (next)?
- Do you mean ...?

-----  
Would you like to see a summary of what comes out of the interviews with staff?

Thank you for your time.
